# Supplementary material for: Common Abnormalities and Disorder-Specific Compensation During Implicit Regulation of Emotional Processing in Generalized Anxiety and Major Depressive Disorders
Source: Atypon-hosted journal article supplement (doi:10.1176/appi.ajp.2011.10091290), 2011-06-03

## Supplemental Figures S1, S2, S3, and S4

**FIGURE S1. Example Task Time Course, Illustrating the Contrasts Made to Examine Adaptation During Congruent or Incongruent Trials<sup>a</sup>**

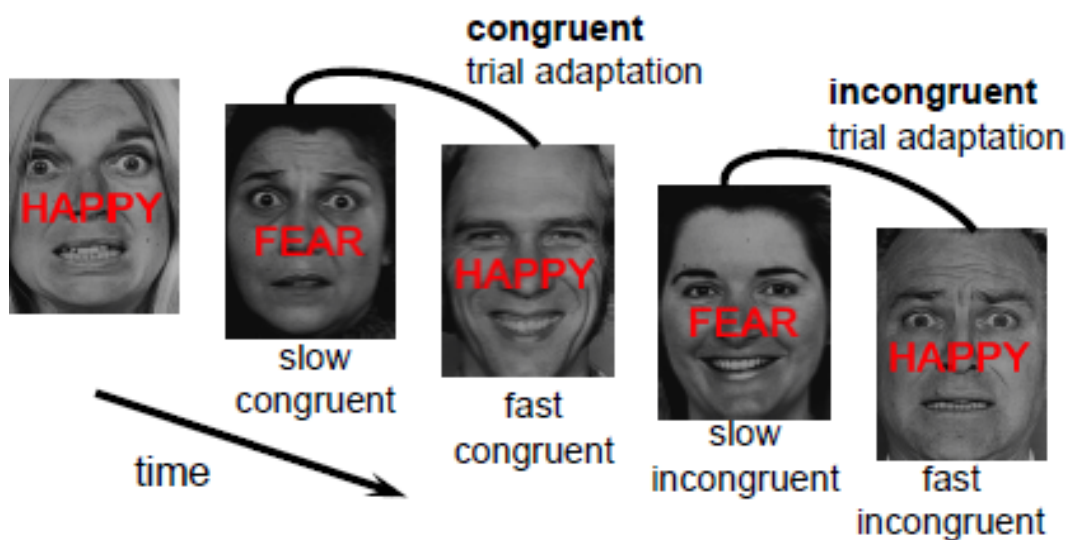

<sup>a</sup> Replicated from our previous paper (Etkin A, Prater KE, Hoeft F, Menon V, Schatzberg AF: Failure of anterior cingulate activation and connectivity with the amygdala during implicit regulation of emotional processing in generalized anxiety disorder. Am J Psychiatry 2010; 167:545–554).

FIGURE S2. Average Reaction Times for Postincongruent Incongruent Trials (il) and Postcongruent Incongruent Trials (cl) Trials in Each Group

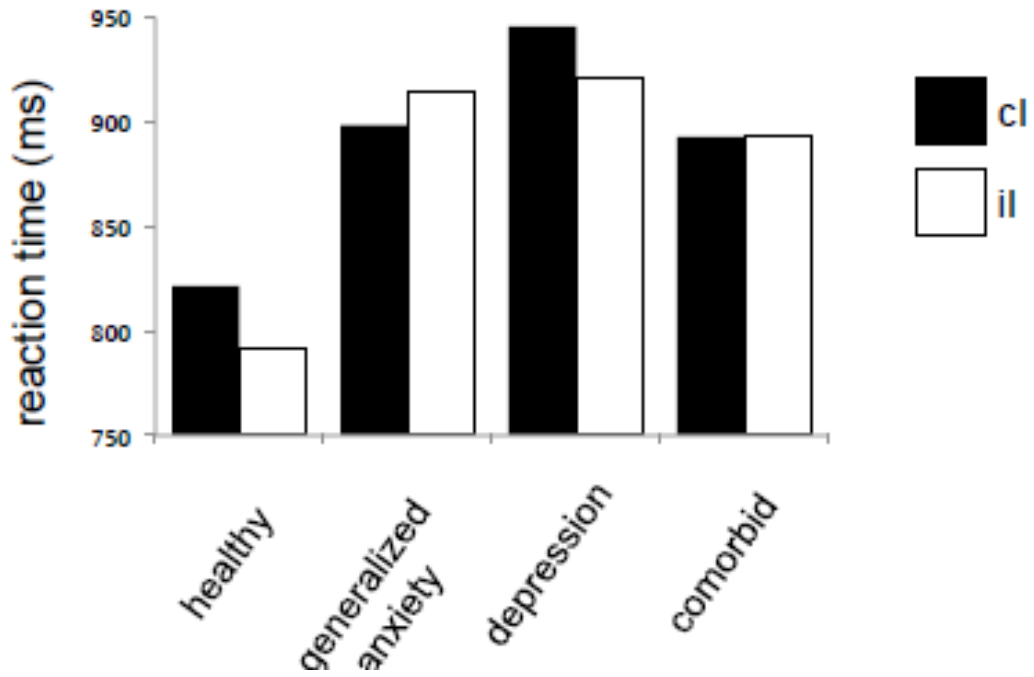

**FIGURE S3. Average Activity for Postincongruent Incongruent Trials (il) and Postcongruent Incongruent Trials (cl) in Each Group for the Ventral Cingulate (A) and Amygdala (B) Clusters Shown in Figures 2A and 2B, Respectively**

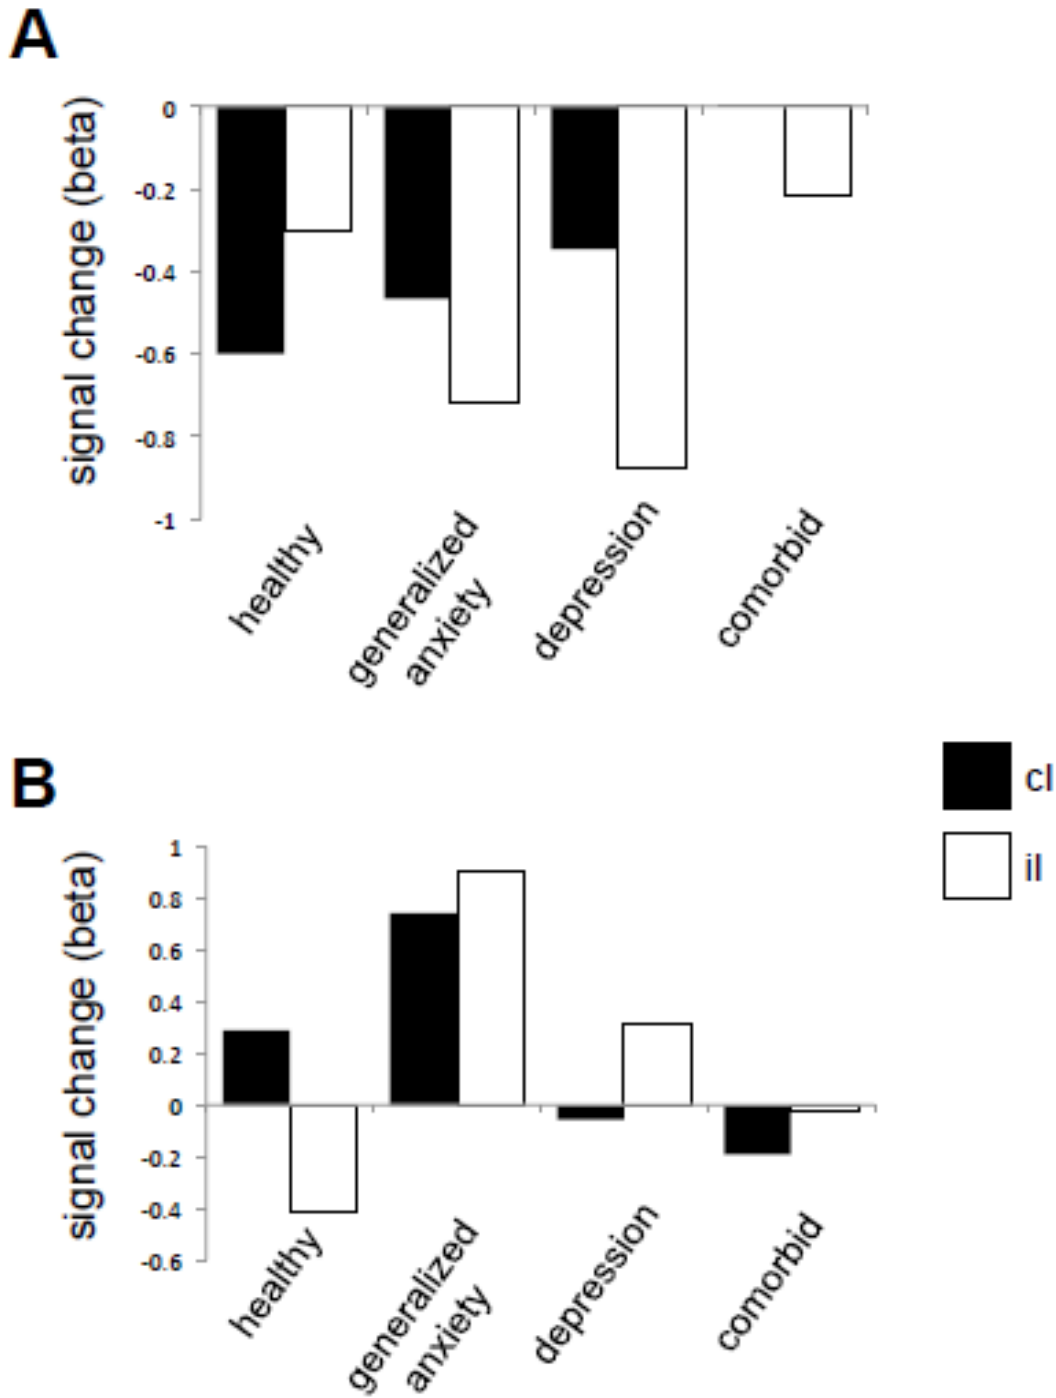

**FIGURE S4. Average Activity for Postincongruent Incongruent Trials (il) and Postcongruent Incongruent Trials (cl) in Each Group for the Left Anterior Middle Frontal Gyrus Cluster Shown in Figure 4B in the Text**

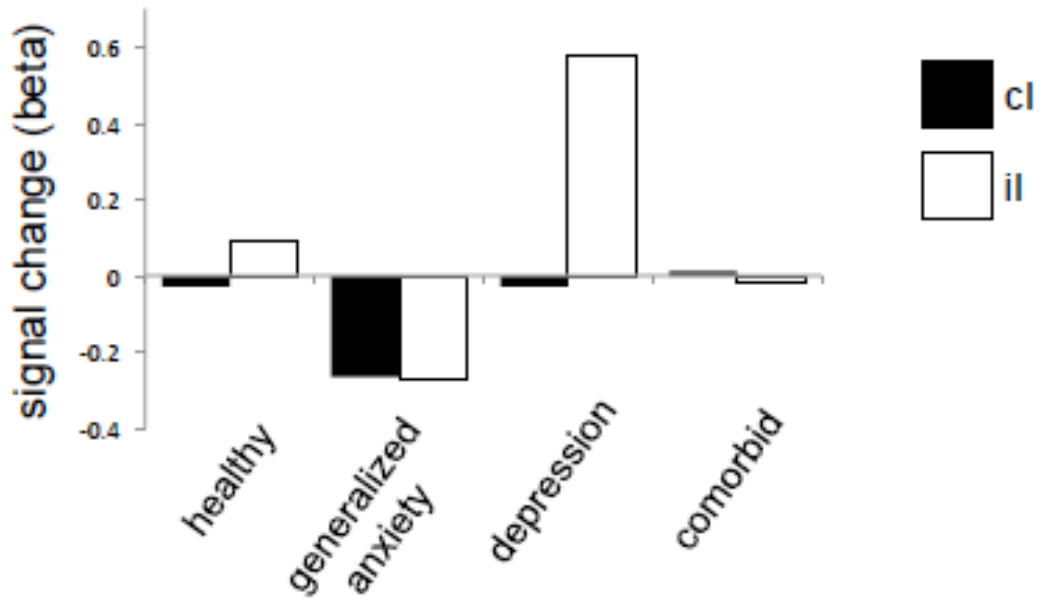

Supplement: ajp_168_09_968_01.pdf [file ajp_168_09_968_01.pdf]
